# Supplementary material
Source: publisher figshare collection journal article supplement (https://acs.figshare.com/ndownloader/files/3795088)
Supplement: Supplementary file 1 [file 3795088]

 
data_1 
 
_audit_creation_method            SHELXL-97 
_chemical_name_systematic 
; 
 ? 
; 
_chemical_name_common             ? 
_chemical_melting_point           ? 
_chemical_formula_moiety          ? 
_chemical_formula_sum 
 'C25 H20 N2 O2' 
_chemical_formula_weight          380.43 
 
loop_ 
 _atom_type_symbol 
 _atom_type_description 
 _atom_type_scat_dispersion_real 
 _atom_type_scat_dispersion_imag 
 _atom_type_scat_source 
 'C'  'C'   0.0033   0.0016 
 'International Tables Vol C Tables 4.2.6.8 and 6.1.1.4' 
 'H'  'H'   0.0000   0.0000 
 'International Tables Vol C Tables 4.2.6.8 and 6.1.1.4' 
 'N'  'N'   0.0061   0.0033 
 'International Tables Vol C Tables 4.2.6.8 and 6.1.1.4' 
 'O'  'O'   0.0106   0.0060 
 'International Tables Vol C Tables 4.2.6.8 and 6.1.1.4' 
 
_symmetry_cell_setting           'Monoclinic'
_symmetry_space_group_name_H-M   'P2(1)/c  ' 
 
loop_ 
 _symmetry_equiv_pos_as_xyz 
 'x, y, z' 
 '-x, y+1/2, -z+1/2' 
 '-x, -y, -z' 
 'x, -y-1/2, z-1/2' 
 
_cell_length_a                    13.373(2) 
_cell_length_b                    16.581(3) 
_cell_length_c                    8.8083(16) 
_cell_angle_alpha                 90.00 
_cell_angle_beta                  93.638(3) 
_cell_angle_gamma                 90.00 
_cell_volume                      1949.2(6) 
_cell_formula_units_Z             4 
_cell_measurement_temperature     296(2) 
_cell_measurement_reflns_used    4054
_cell_measurement_theta_min        2.46
_cell_measurement_theta_max       27.30 
 
_exptl_crystal_description        'block' 
_exptl_crystal_colour             'colorless' 
_exptl_crystal_size_max           0.26 
_exptl_crystal_size_mid           0.24 
_exptl_crystal_size_min           0.22 
_exptl_crystal_density_meas       ? 
_exptl_crystal_density_diffrn     1.296 
_exptl_crystal_density_method     'not measured' 
_exptl_crystal_F_000              800 
_exptl_absorpt_coefficient_mu     0.083 
_exptl_absorpt_correction_type    'multi-scan' 
_exptl_absorpt_correction_T_min   0.9788 
_exptl_absorpt_correction_T_max   0.9820 
_exptl_absorpt_process_details    'sadabs' 
 
_exptl_special_details 
; 
 ? 
; 
 
_diffrn_ambient_temperature       296(2) 
_diffrn_radiation_wavelength      0.71073 
_diffrn_radiation_type            MoK\a 
_diffrn_radiation_source          'fine-focus sealed tube' 
_diffrn_radiation_monochromator   graphite 
_diffrn_measurement_device_type  'CCD area detector'
_diffrn_measurement_method       'phi and omega scans' 
_diffrn_detector_area_resol_mean  ? 
_diffrn_standards_number          ? 
_diffrn_standards_interval_count  ? 
_diffrn_standards_interval_time   ? 
_diffrn_standards_decay_%         ? 
_diffrn_reflns_number             10656 
_diffrn_reflns_av_R_equivalents   0.0230 
_diffrn_reflns_av_sigmaI/netI     0.0228 
_diffrn_reflns_limit_h_min        -15 
_diffrn_reflns_limit_h_max        15 
_diffrn_reflns_limit_k_min        -19 
_diffrn_reflns_limit_k_max        19 
_diffrn_reflns_limit_l_min        -9 
_diffrn_reflns_limit_l_max        10 
_diffrn_reflns_theta_min          1.53 
_diffrn_reflns_theta_max          25.01 
_reflns_number_total              3434 
_reflns_number_gt                 2810 
_reflns_threshold_expression      >2sigma(I) 
 
_computing_data_collection      'Bruker SMART'
_computing_cell_refinement      'Bruker SMART'
_computing_data_reduction       'Bruker SAINT'
_computing_structure_solution     'SHELXS-97 (Sheldrick, 1990)' 
_computing_structure_refinement   'SHELXL-97 (Sheldrick, 1997)' 
_computing_molecular_graphics   'Bruker SHELXTL'
_computing_publication_material 'Bruker SHELXTL'
 
_refine_special_details 
; 
 Refinement of F^2^ against ALL reflections.  The weighted R-factor wR and 
 goodness of fit S are based on F^2^, conventional R-factors R are based 
 on F, with F set to zero for negative F^2^. The threshold expression of 
 F^2^ > 2sigma(F^2^) is used only for calculating R-factors(gt) etc. and is 
 not relevant to the choice of reflections for refinement.  R-factors based 
 on F^2^ are statistically about twice as large as those based on F, and R- 
 factors based on ALL data will be even larger. 
; 
 
_refine_ls_structure_factor_coef  Fsqd  
_refine_ls_matrix_type            full 
_refine_ls_weighting_scheme       calc  
_refine_ls_weighting_details 
 'calc w=1/[\s^2^(Fo^2^)+(0.0666P)^2^+0.2829P] where P=(Fo^2^+2Fc^2^)/3' 
_atom_sites_solution_primary      direct 
_atom_sites_solution_secondary    difmap 
_atom_sites_solution_hydrogens    geom 
_refine_ls_hydrogen_treatment     mixed 
_refine_ls_extinction_method      SHELXL 
_refine_ls_extinction_coef        0.0113(17) 
_refine_ls_extinction_expression 
 'Fc^*^=kFc[1+0.001xFc^2^\l^3^/sin(2\q)]^-1/4^' 
_refine_ls_number_reflns          3434 
_refine_ls_number_parameters      263 
_refine_ls_number_restraints      0 
_refine_ls_R_factor_all           0.0463 
_refine_ls_R_factor_gt            0.0364 
_refine_ls_wR_factor_ref          0.1201 
_refine_ls_wR_factor_gt           0.1043 
_refine_ls_goodness_of_fit_ref    1.069 
_refine_ls_restrained_S_all       1.069 
_refine_ls_shift/su_max           0.001 
_refine_ls_shift/su_mean          0.000 
 
loop_ 
 _atom_site_label 
 _atom_site_type_symbol 
 _atom_site_fract_x 
 _atom_site_fract_y 
 _atom_site_fract_z 
 _atom_site_U_iso_or_equiv 
 _atom_site_adp_type 
 _atom_site_occupancy 
 _atom_site_symmetry_multiplicity 
 _atom_site_calc_flag 
 _atom_site_refinement_flags 
 _atom_site_disorder_assembly 
 _atom_site_disorder_group 
C1 C 0.39095(11) 0.23948(9) 1.07473(15) 0.0393(4) Uani 1 1 d . . . 
C2 C 0.35184(13) 0.30870(9) 1.00468(17) 0.0476(4) Uani 1 1 d . . . 
H2 H 0.2844 0.3104 0.9717 0.057 Uiso 1 1 calc R . . 
C3 C 0.41198(16) 0.37509(10) 0.98338(19) 0.0590(5) Uani 1 1 d . . . 
H3 H 0.3847 0.4209 0.9360 0.071 Uiso 1 1 calc R . . 
C4 C 0.51147(16) 0.37399(12) 1.0314(2) 0.0679(6) Uani 1 1 d . . . 
H4 H 0.5518 0.4186 1.0166 0.082 Uiso 1 1 calc R . . 
C5 C 0.55095(15) 0.30595(12) 1.1019(2) 0.0676(5) Uani 1 1 d . . . 
H5 H 0.6185 0.3049 1.1344 0.081 Uiso 1 1 calc R . . 
C6 C 0.49195(12) 0.23929(10) 1.1249(2) 0.0523(4) Uani 1 1 d . . . 
H6 H 0.5196 0.1941 1.1740 0.063 Uiso 1 1 calc R . . 
C7 C 0.37433(10) 0.09149(8) 1.05801(16) 0.0373(3) Uani 1 1 d . . . 
H7 H 0.4418 0.0792 1.1018 0.045 Uiso 1 1 calc R . . 
C8 C 0.23291(11) 0.15976(9) 1.01928(16) 0.0385(3) Uani 1 1 d . . . 
H8 H 0.1846 0.2033 1.0314 0.046 Uiso 1 1 calc R . . 
C9 C 0.36384(10) 0.09958(8) 0.88007(15) 0.0348(3) Uani 1 1 d . . . 
H9 H 0.4201 0.1301 0.8430 0.042 Uiso 1 1 calc R . . 
C10 C 0.26550(10) 0.14649(8) 0.85254(15) 0.0345(3) Uani 1 1 d . . . 
H10 H 0.2777 0.1984 0.8038 0.041 Uiso 1 1 calc R . . 
C11 C 0.34774(10) 0.02245(9) 0.79188(16) 0.0384(3) Uani 1 1 d . . . 
C12 C 0.19992(10) 0.09399(9) 0.74884(16) 0.0374(3) Uani 1 1 d . . . 
C13 C 0.20339(11) 0.07856(10) 1.08060(16) 0.0417(4) Uani 1 1 d . . . 
C14 C 0.11280(13) 0.04333(12) 1.10827(18) 0.0545(4) Uani 1 1 d . . . 
H14 H 0.0528 0.0711 1.0906 0.065 Uiso 1 1 calc R . . 
C15 C 0.11474(16) -0.03544(13) 1.1637(2) 0.0667(6) Uani 1 1 d . . . 
H15 H 0.0549 -0.0601 1.1857 0.080 Uiso 1 1 calc R . . 
C16 C 0.20241(17) -0.07716(12) 1.1866(2) 0.0683(6) Uani 1 1 d . . . 
H16 H 0.2011 -0.1297 1.2233 0.082 Uiso 1 1 calc R . . 
C17 C 0.29362(14) -0.04243(10) 1.15600(19) 0.0553(4) Uani 1 1 d . . . 
H17 H 0.3532 -0.0712 1.1697 0.066 Uiso 1 1 calc R . . 
C18 C 0.29253(11) 0.03604(9) 1.10474(16) 0.0406(4) Uani 1 1 d . . . 
C19 C 0.21547(12) -0.03582(10) 0.60765(17) 0.0476(4) Uani 1 1 d . . . 
H19A H 0.2725 -0.0611 0.5641 0.057 Uiso 1 1 calc R . . 
H19B H 0.1772 -0.0083 0.5260 0.057 Uiso 1 1 calc R . . 
C20 C 0.15100(12) -0.10065(9) 0.66963(18) 0.0444(4) Uani 1 1 d . . . 
C21 C 0.05852(13) -0.11710(11) 0.5995(2) 0.0568(5) Uani 1 1 d . . . 
H21 H 0.0345 -0.0860 0.5173 0.068 Uiso 1 1 calc R . . 
C22 C 0.00107(16) -0.17950(14) 0.6503(3) 0.0758(6) Uani 1 1 d . . . 
H22 H -0.0612 -0.1905 0.6015 0.091 Uiso 1 1 calc R . . 
C23 C 0.03554(18) -0.22560(13) 0.7730(3) 0.0782(6) Uani 1 1 d . . . 
H23 H -0.0030 -0.2679 0.8065 0.094 Uiso 1 1 calc R . . 
C24 C 0.12621(19) -0.20873(12) 0.8445(3) 0.0799(6) Uani 1 1 d . . . 
H24 H 0.1492 -0.2391 0.9284 0.096 Uiso 1 1 calc R . . 
C25 C 0.18440(15) -0.14680(11) 0.7935(2) 0.0657(5) Uani 1 1 d . . . 
H25 H 0.2465 -0.1360 0.8429 0.079 Uiso 1 1 calc R . . 
N1 N 0.33182(9) 0.17056(7) 1.10393(13) 0.0376(3) Uani 1 1 d . . . 
N2 N 0.25267(9) 0.02436(7) 0.71913(13) 0.0371(3) Uani 1 1 d . . . 
O1 O 0.11674(8) 0.10837(7) 0.69389(13) 0.0577(3) Uani 1 1 d . . . 
O2 O 0.40536(8) -0.03290(7) 0.78133(14) 0.0571(3) Uani 1 1 d . . . 
 
loop_ 
 _atom_site_aniso_label 
 _atom_site_aniso_U_11 
 _atom_site_aniso_U_22 
 _atom_site_aniso_U_33 
 _atom_site_aniso_U_23 
 _atom_site_aniso_U_13 
 _atom_site_aniso_U_12 
C1 0.0468(9) 0.0426(8) 0.0291(7) -0.0074(6) 0.0066(6) -0.0058(7) 
C2 0.0638(10) 0.0432(9) 0.0359(8) -0.0042(7) 0.0029(7) -0.0016(7) 
C3 0.0930(15) 0.0440(9) 0.0408(9) -0.0032(7) 0.0116(9) -0.0086(9) 
C4 0.0843(15) 0.0585(12) 0.0634(12) -0.0096(9) 0.0244(11) -0.0272(10) 
C5 0.0565(11) 0.0692(13) 0.0778(13) -0.0164(10) 0.0104(10) -0.0196(10) 
C6 0.0462(9) 0.0521(9) 0.0583(10) -0.0073(8) 0.0003(7) -0.0074(7) 
C7 0.0332(7) 0.0412(8) 0.0365(8) 0.0023(6) -0.0052(6) 0.0003(6) 
C8 0.0366(8) 0.0440(8) 0.0348(8) -0.0022(6) 0.0024(6) 0.0042(6) 
C9 0.0297(7) 0.0396(8) 0.0350(7) 0.0003(6) 0.0017(5) -0.0012(6) 
C10 0.0338(7) 0.0374(7) 0.0321(7) 0.0018(6) 0.0007(6) 0.0014(6) 
C11 0.0338(8) 0.0434(8) 0.0382(8) -0.0017(6) 0.0035(6) 0.0032(6) 
C12 0.0353(8) 0.0437(8) 0.0327(7) 0.0020(6) -0.0004(6) 0.0025(6) 
C13 0.0425(8) 0.0535(9) 0.0292(7) -0.0017(6) 0.0040(6) -0.0044(7) 
C14 0.0456(9) 0.0767(12) 0.0417(9) -0.0044(8) 0.0080(7) -0.0115(8) 
C15 0.0683(13) 0.0824(13) 0.0502(10) 0.0044(9) 0.0098(9) -0.0346(11) 
C16 0.0902(15) 0.0612(11) 0.0525(11) 0.0151(9) -0.0018(10) -0.0267(11) 
C17 0.0646(11) 0.0522(10) 0.0476(9) 0.0120(8) -0.0084(8) -0.0074(8) 
C18 0.0440(8) 0.0474(8) 0.0301(7) 0.0031(6) -0.0019(6) -0.0054(7) 
C19 0.0527(9) 0.0506(9) 0.0392(8) -0.0107(7) -0.0005(7) -0.0060(7) 
C20 0.0487(9) 0.0398(8) 0.0445(9) -0.0115(6) 0.0009(7) -0.0020(7) 
C21 0.0518(10) 0.0611(11) 0.0568(10) -0.0137(8) -0.0025(8) -0.0068(8) 
C22 0.0642(13) 0.0815(14) 0.0813(15) -0.0246(12) 0.0026(11) -0.0260(11) 
C23 0.0931(16) 0.0572(12) 0.0865(15) -0.0178(11) 0.0238(13) -0.0299(11) 
C24 0.1062(18) 0.0541(11) 0.0789(14) 0.0093(10) 0.0010(13) -0.0136(12) 
C25 0.0670(12) 0.0584(11) 0.0697(12) 0.0041(9) -0.0118(10) -0.0096(9) 
N1 0.0398(7) 0.0402(7) 0.0323(6) -0.0010(5) -0.0002(5) -0.0024(5) 
N2 0.0353(6) 0.0398(6) 0.0357(6) -0.0035(5) -0.0017(5) -0.0013(5) 
O1 0.0437(7) 0.0682(8) 0.0587(7) -0.0064(6) -0.0168(5) 0.0122(6) 
O2 0.0462(7) 0.0556(7) 0.0684(8) -0.0158(6) -0.0031(6) 0.0165(5) 
 
_geom_special_details 
; 
 All esds (except the esd in the dihedral angle between two l.s. planes) 
 are estimated using the full covariance matrix.  The cell esds are taken 
 into account individually in the estimation of esds in distances, angles 
 and torsion angles; correlations between esds in cell parameters are only 
 used when they are defined by crystal symmetry.  An approximate (isotropic) 
 treatment of cell esds is used for estimating esds involving l.s. planes. 
; 
 
loop_ 
 _geom_bond_atom_site_label_1 
 _geom_bond_atom_site_label_2 
 _geom_bond_distance 
 _geom_bond_site_symmetry_2 
 _geom_bond_publ_flag 
C1 C2 1.389(2) . ? 
C1 C6 1.394(2) . ? 
C1 N1 1.4224(18) . ? 
C2 C3 1.383(2) . ? 
C2 H2 0.9300 . ? 
C3 C4 1.370(3) . ? 
C3 H3 0.9300 . ? 
C4 C5 1.377(3) . ? 
C4 H4 0.9300 . ? 
C5 C6 1.380(2) . ? 
C5 H5 0.9300 . ? 
C6 H6 0.9300 . ? 
C7 N1 1.4949(18) . ? 
C7 C18 1.506(2) . ? 
C7 C9 1.5704(19) . ? 
C7 H7 0.9800 . ? 
C8 N1 1.4874(18) . ? 
C8 C13 1.512(2) . ? 
C8 C10 1.5738(19) . ? 
C8 H8 0.9800 . ? 
C9 C11 1.505(2) . ? 
C9 C10 1.5338(19) . ? 
C9 H9 0.9800 . ? 
C10 C12 1.503(2) . ? 
C10 H10 0.9800 . ? 
C11 O2 1.2057(17) . ? 
C11 N2 1.3873(19) . ? 
C12 O1 1.2084(17) . ? 
C12 N2 1.3865(18) . ? 
C13 C14 1.381(2) . ? 
C13 C18 1.390(2) . ? 
C14 C15 1.394(3) . ? 
C14 H14 0.9300 . ? 
C15 C16 1.365(3) . ? 
C15 H15 0.9300 . ? 
C16 C17 1.391(3) . ? 
C16 H16 0.9300 . ? 
C17 C18 1.377(2) . ? 
C17 H17 0.9300 . ? 
C19 N2 1.4648(18) . ? 
C19 C20 1.502(2) . ? 
C19 H19A 0.9700 . ? 
C19 H19B 0.9700 . ? 
C20 C21 1.374(2) . ? 
C20 C25 1.384(2) . ? 
C21 C22 1.380(3) . ? 
C21 H21 0.9300 . ? 
C22 C23 1.379(3) . ? 
C22 H22 0.9300 . ? 
C23 C24 1.360(3) . ? 
C23 H23 0.9300 . ? 
C24 C25 1.381(3) . ? 
C24 H24 0.9300 . ? 
C25 H25 0.9300 . ? 
 
loop_ 
 _geom_angle_atom_site_label_1 
 _geom_angle_atom_site_label_2 
 _geom_angle_atom_site_label_3 
 _geom_angle 
 _geom_angle_site_symmetry_1 
 _geom_angle_site_symmetry_3 
 _geom_angle_publ_flag 
C2 C1 C6 118.19(14) . . ? 
C2 C1 N1 123.09(14) . . ? 
C6 C1 N1 118.65(14) . . ? 
C3 C2 C1 120.79(17) . . ? 
C3 C2 H2 119.6 . . ? 
C1 C2 H2 119.6 . . ? 
C4 C3 C2 120.60(18) . . ? 
C4 C3 H3 119.7 . . ? 
C2 C3 H3 119.7 . . ? 
C3 C4 C5 119.15(17) . . ? 
C3 C4 H4 120.4 . . ? 
C5 C4 H4 120.4 . . ? 
C4 C5 C6 121.06(19) . . ? 
C4 C5 H5 119.5 . . ? 
C6 C5 H5 119.5 . . ? 
C5 C6 C1 120.20(17) . . ? 
C5 C6 H6 119.9 . . ? 
C1 C6 H6 119.9 . . ? 
N1 C7 C18 99.56(11) . . ? 
N1 C7 C9 100.59(10) . . ? 
C18 C7 C9 107.72(11) . . ? 
N1 C7 H7 115.6 . . ? 
C18 C7 H7 115.6 . . ? 
C9 C7 H7 115.6 . . ? 
N1 C8 C13 99.91(11) . . ? 
N1 C8 C10 101.21(10) . . ? 
C13 C8 C10 107.63(11) . . ? 
N1 C8 H8 115.4 . . ? 
C13 C8 H8 115.4 . . ? 
C10 C8 H8 115.4 . . ? 
C11 C9 C10 104.85(11) . . ? 
C11 C9 C7 116.32(11) . . ? 
C10 C9 C7 102.86(10) . . ? 
C11 C9 H9 110.8 . . ? 
C10 C9 H9 110.8 . . ? 
C7 C9 H9 110.8 . . ? 
C12 C10 C9 105.29(11) . . ? 
C12 C10 C8 117.56(11) . . ? 
C9 C10 C8 102.05(10) . . ? 
C12 C10 H10 110.5 . . ? 
C9 C10 H10 110.5 . . ? 
C8 C10 H10 110.5 . . ? 
O2 C11 N2 123.59(13) . . ? 
O2 C11 C9 127.99(13) . . ? 
N2 C11 C9 108.42(11) . . ? 
O1 C12 N2 123.72(13) . . ? 
O1 C12 C10 128.02(13) . . ? 
N2 C12 C10 108.22(11) . . ? 
C14 C13 C18 120.81(16) . . ? 
C14 C13 C8 133.76(15) . . ? 
C18 C13 C8 105.39(12) . . ? 
C13 C14 C15 117.47(17) . . ? 
C13 C14 H14 121.3 . . ? 
C15 C14 H14 121.3 . . ? 
C16 C15 C14 121.54(17) . . ? 
C16 C15 H15 119.2 . . ? 
C14 C15 H15 119.2 . . ? 
C15 C16 C17 121.15(18) . . ? 
C15 C16 H16 119.4 . . ? 
C17 C16 H16 119.4 . . ? 
C18 C17 C16 117.62(18) . . ? 
C18 C17 H17 121.2 . . ? 
C16 C17 H17 121.2 . . ? 
C17 C18 C13 121.37(15) . . ? 
C17 C18 C7 132.35(15) . . ? 
C13 C18 C7 106.22(13) . . ? 
N2 C19 C20 114.97(12) . . ? 
N2 C19 H19A 108.5 . . ? 
C20 C19 H19A 108.5 . . ? 
N2 C19 H19B 108.5 . . ? 
C20 C19 H19B 108.5 . . ? 
H19A C19 H19B 107.5 . . ? 
C21 C20 C25 118.76(16) . . ? 
C21 C20 C19 119.97(15) . . ? 
C25 C20 C19 121.22(15) . . ? 
C20 C21 C22 120.45(19) . . ? 
C20 C21 H21 119.8 . . ? 
C22 C21 H21 119.8 . . ? 
C23 C22 C21 120.28(19) . . ? 
C23 C22 H22 119.9 . . ? 
C21 C22 H22 119.9 . . ? 
C24 C23 C22 119.56(19) . . ? 
C24 C23 H23 120.2 . . ? 
C22 C23 H23 120.2 . . ? 
C23 C24 C25 120.4(2) . . ? 
C23 C24 H24 119.8 . . ? 
C25 C24 H24 119.8 . . ? 
C24 C25 C20 120.50(18) . . ? 
C24 C25 H25 119.8 . . ? 
C20 C25 H25 119.8 . . ? 
C1 N1 C8 119.54(11) . . ? 
C1 N1 C7 115.49(11) . . ? 
C8 N1 C7 95.75(10) . . ? 
C12 N2 C11 113.21(12) . . ? 
C12 N2 C19 122.58(12) . . ? 
C11 N2 C19 123.81(12) . . ? 
 
loop_ 
 _geom_torsion_atom_site_label_1 
 _geom_torsion_atom_site_label_2 
 _geom_torsion_atom_site_label_3 
 _geom_torsion_atom_site_label_4 
 _geom_torsion 
 _geom_torsion_site_symmetry_1 
 _geom_torsion_site_symmetry_2 
 _geom_torsion_site_symmetry_3 
 _geom_torsion_site_symmetry_4 
 _geom_torsion_publ_flag 
C6 C1 C2 C3 0.9(2) . . . . ? 
N1 C1 C2 C3 177.88(13) . . . . ? 
C1 C2 C3 C4 -0.2(2) . . . . ? 
C2 C3 C4 C5 -0.2(3) . . . . ? 
C3 C4 C5 C6 -0.2(3) . . . . ? 
C4 C5 C6 C1 0.9(3) . . . . ? 
C2 C1 C6 C5 -1.3(2) . . . . ? 
N1 C1 C6 C5 -178.38(14) . . . . ? 
N1 C7 C9 C11 -149.51(11) . . . . ? 
C18 C7 C9 C11 -45.79(15) . . . . ? 
N1 C7 C9 C10 -35.55(12) . . . . ? 
C18 C7 C9 C10 68.17(13) . . . . ? 
C11 C9 C10 C12 -0.77(14) . . . . ? 
C7 C9 C10 C12 -122.85(11) . . . . ? 
C11 C9 C10 C8 122.52(11) . . . . ? 
C7 C9 C10 C8 0.44(13) . . . . ? 
N1 C8 C10 C12 149.63(11) . . . . ? 
C13 C8 C10 C12 45.33(16) . . . . ? 
N1 C8 C10 C9 35.08(13) . . . . ? 
C13 C8 C10 C9 -69.23(13) . . . . ? 
C10 C9 C11 O2 -179.64(15) . . . . ? 
C7 C9 C11 O2 -66.81(19) . . . . ? 
C10 C9 C11 N2 1.04(14) . . . . ? 
C7 C9 C11 N2 113.87(13) . . . . ? 
C9 C10 C12 O1 -177.44(14) . . . . ? 
C8 C10 C12 O1 69.8(2) . . . . ? 
C9 C10 C12 N2 0.26(14) . . . . ? 
C8 C10 C12 N2 -112.50(13) . . . . ? 
N1 C8 C13 C14 148.38(16) . . . . ? 
C10 C8 C13 C14 -106.39(18) . . . . ? 
N1 C8 C13 C18 -33.91(13) . . . . ? 
C10 C8 C13 C18 71.32(14) . . . . ? 
C18 C13 C14 C15 1.2(2) . . . . ? 
C8 C13 C14 C15 178.64(15) . . . . ? 
C13 C14 C15 C16 -1.5(3) . . . . ? 
C14 C15 C16 C17 0.3(3) . . . . ? 
C15 C16 C17 C18 1.3(3) . . . . ? 
C16 C17 C18 C13 -1.6(2) . . . . ? 
C16 C17 C18 C7 -178.57(15) . . . . ? 
C14 C13 C18 C17 0.4(2) . . . . ? 
C8 C13 C18 C17 -177.71(13) . . . . ? 
C14 C13 C18 C7 178.03(13) . . . . ? 
C8 C13 C18 C7 -0.05(15) . . . . ? 
N1 C7 C18 C17 -148.94(16) . . . . ? 
C9 C7 C18 C17 106.62(18) . . . . ? 
N1 C7 C18 C13 33.76(13) . . . . ? 
C9 C7 C18 C13 -70.69(14) . . . . ? 
N2 C19 C20 C21 127.98(16) . . . . ? 
N2 C19 C20 C25 -54.5(2) . . . . ? 
C25 C20 C21 C22 -1.2(3) . . . . ? 
C19 C20 C21 C22 176.35(16) . . . . ? 
C20 C21 C22 C23 0.6(3) . . . . ? 
C21 C22 C23 C24 0.6(3) . . . . ? 
C22 C23 C24 C25 -1.1(3) . . . . ? 
C23 C24 C25 C20 0.5(3) . . . . ? 
C21 C20 C25 C24 0.7(3) . . . . ? 
C19 C20 C25 C24 -176.84(18) . . . . ? 
C2 C1 N1 C8 18.79(19) . . . . ? 
C6 C1 N1 C8 -164.30(13) . . . . ? 
C2 C1 N1 C7 132.22(14) . . . . ? 
C6 C1 N1 C7 -50.86(17) . . . . ? 
C13 C8 N1 C1 176.72(11) . . . . ? 
C10 C8 N1 C1 66.35(14) . . . . ? 
C13 C8 N1 C7 53.07(11) . . . . ? 
C10 C8 N1 C7 -57.30(11) . . . . ? 
C18 C7 N1 C1 -179.59(11) . . . . ? 
C9 C7 N1 C1 -69.37(13) . . . . ? 
C18 C7 N1 C8 -52.94(11) . . . . ? 
C9 C7 N1 C8 57.28(11) . . . . ? 
O1 C12 N2 C11 178.24(14) . . . . ? 
C10 C12 N2 C11 0.43(16) . . . . ? 
O1 C12 N2 C19 5.2(2) . . . . ? 
C10 C12 N2 C19 -172.64(12) . . . . ? 
O2 C11 N2 C12 179.70(14) . . . . ? 
C9 C11 N2 C12 -0.95(16) . . . . ? 
O2 C11 N2 C19 -7.3(2) . . . . ? 
C9 C11 N2 C19 172.02(12) . . . . ? 
C20 C19 N2 C12 -89.19(17) . . . . ? 
C20 C19 N2 C11 98.48(17) . . . . ? 
 
_diffrn_measured_fraction_theta_max    0.998 
_diffrn_reflns_theta_full              25.01 
_diffrn_measured_fraction_theta_full   0.998 
_refine_diff_density_max    0.154 
_refine_diff_density_min   -0.148 
_refine_diff_density_rms    0.041 
